# Supplementary material for: Unusual parallel entanglement of metal–organic 2D frameworks with coexistence of polyrotaxane, polycatenane and interdigitation
Source: Royal Society of Chemistry journal article supplement (doi:10.1039/b820600g), 2009-01-01
Supplement: b820600g.pdf [file b820600g.pdf]

## Unusual Parallel Entanglement of Metal-Organic 2D Frameworks with Coexistence of Polyrotaxane, Polycatenane and Interdigitation

Xin-Yi Cao,<sup>[a]</sup> Yuan-Gen Yao,<sup>\*[a]</sup> Stuart R. Batten,<sup>\*[b]</sup> En Ma,<sup>[a]</sup> Ye-Yan Qin,<sup>[a]</sup> Jian Zhang,<sup>[a]</sup>  
Rui-Bo Zhang,<sup>[a]</sup> and Jian-Kai Cheng<sup>[a]</sup>

[a] State Key Laboratory of Structural Chemistry, Fujian Institute of Research on the  
Structure of Matter, Chinese Academy of Sciences, Fuzhou, Fujian 350002, China

[b] School of Chemistry, Monash University, Victoria, 3800, Australia

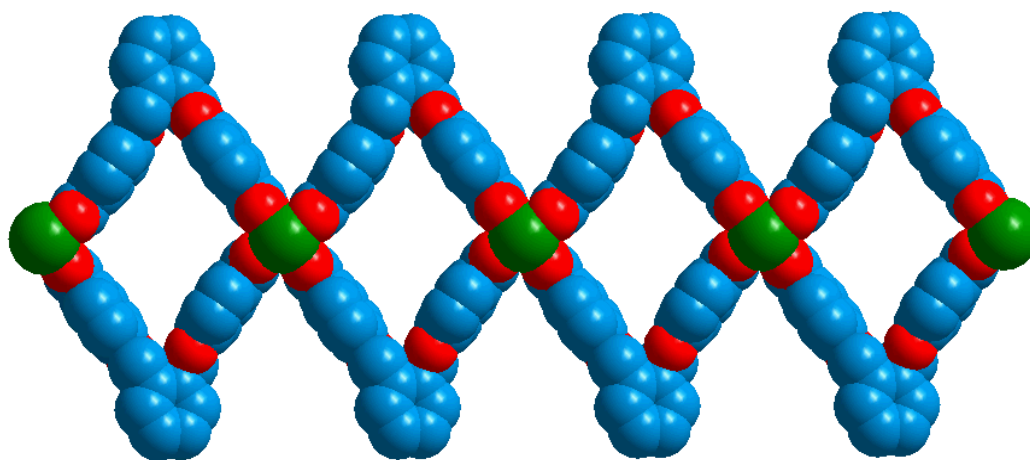

Figure S1 Space-filling plots of the neutral chain of loops  $[\text{Zn}_2(1,2\text{-BBOMB})_2]_n$   
in complex **1**.

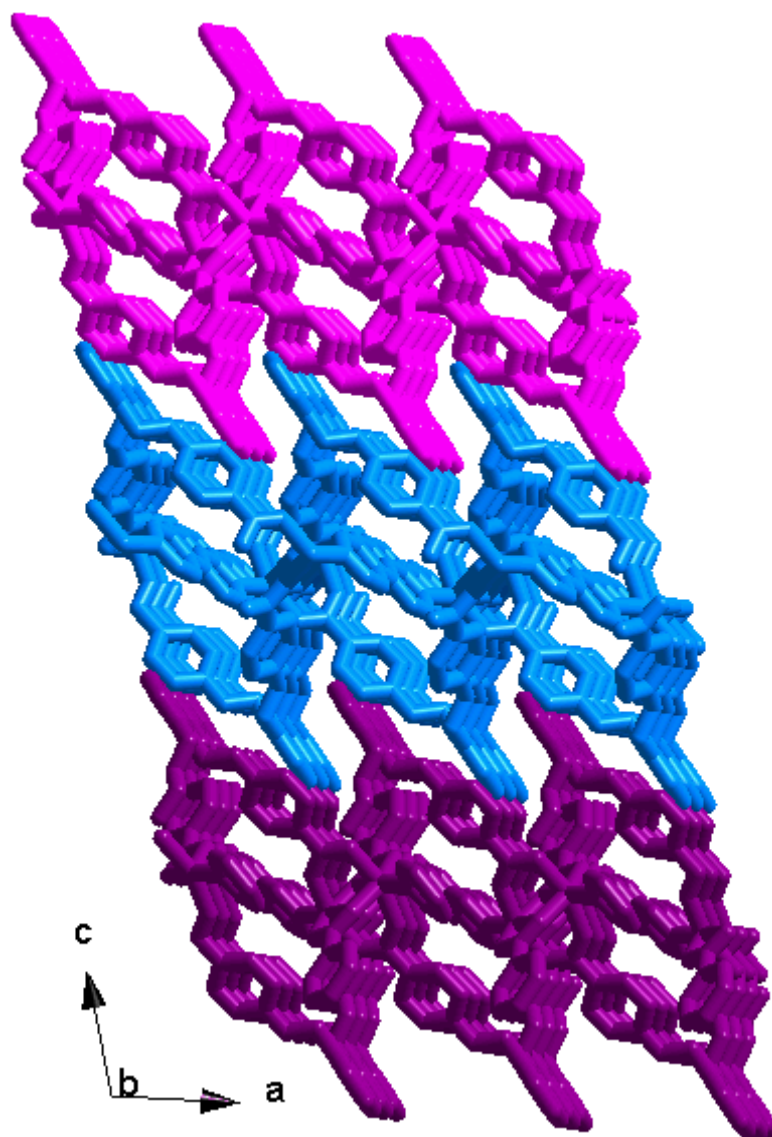

Figure S2 The adjacent layers are interdigitated each other to form 3D architecture in complex **1**.

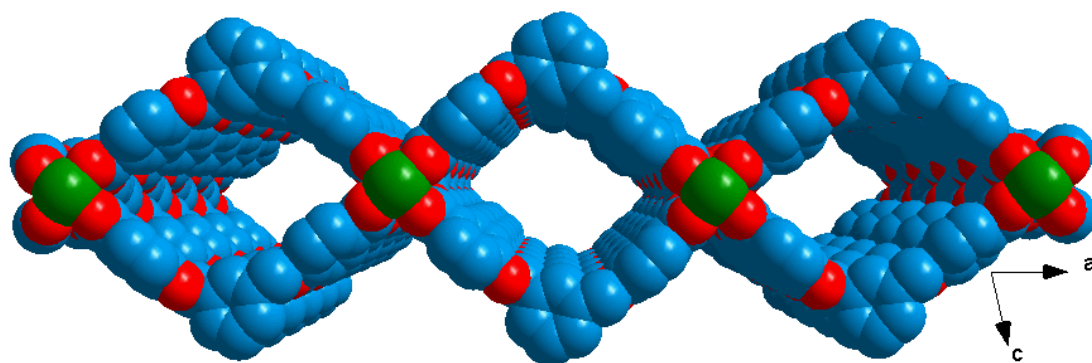

Figure S3 Space-filling plots of the single net in **2** viewed along the *b* axis.

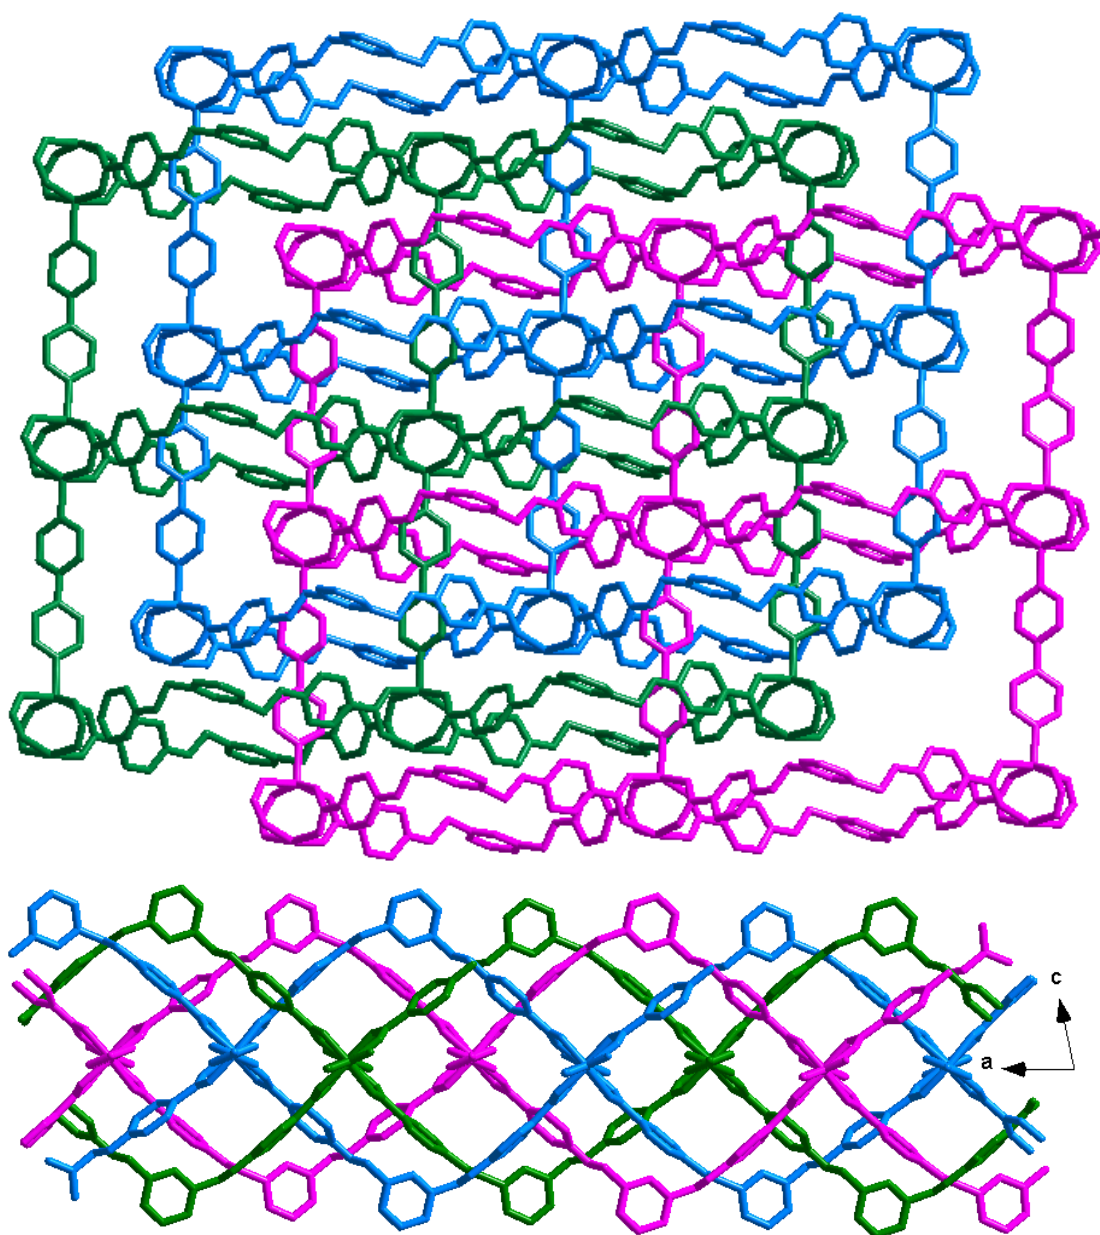

Figure S4 Two views of parallel 2D→2D triply interpenetrating nets in **2**

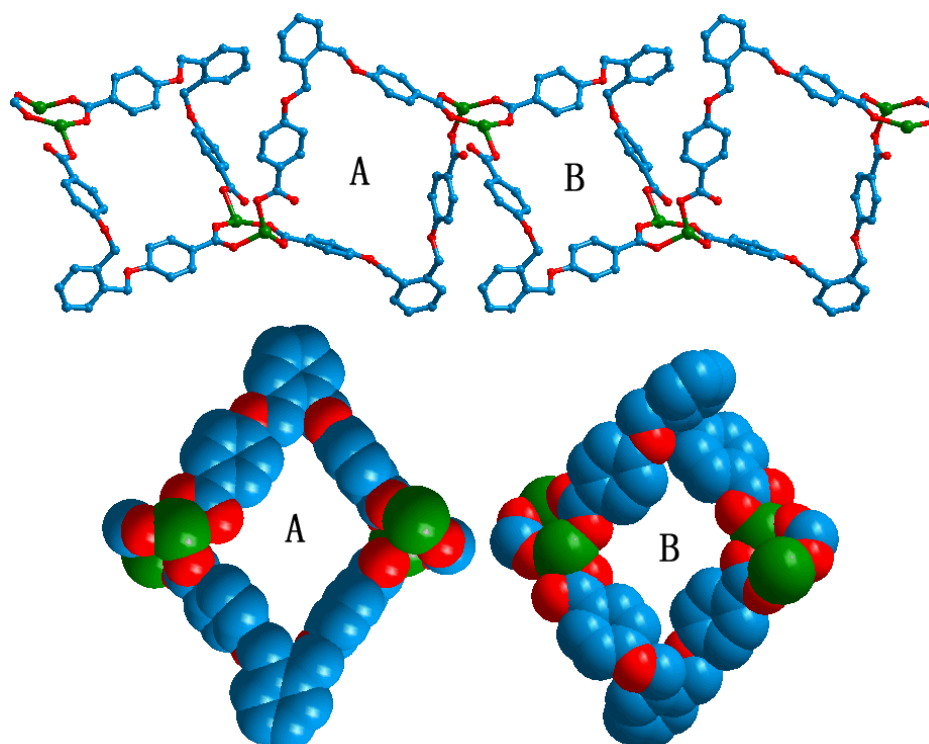

Figure S5 A view of the neutral chain of loops  $[\text{Zn}_2(1,2\text{-BBOMB})_2]_n$  with two type rings in complex **3**. Space-filling plots of type A and B loops in **3**.

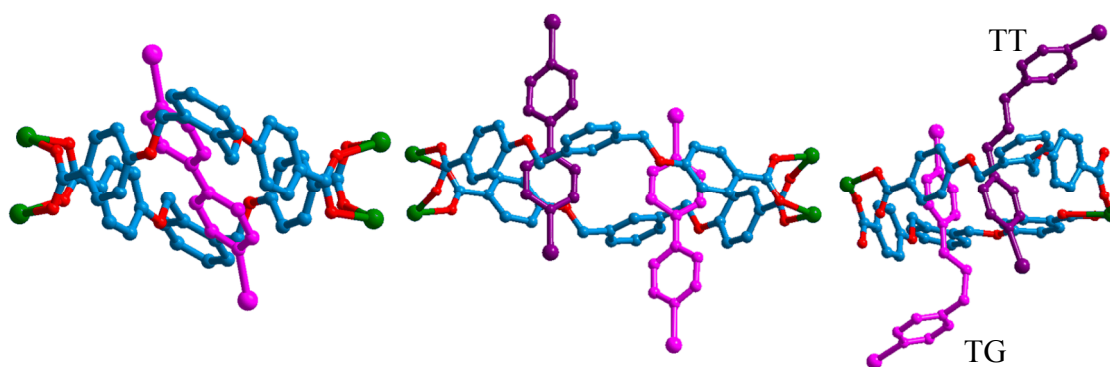

Figure S6 The comparison of the stereochemical relationships between the 4,4'-bipy or bpp rods and the  $[\text{Zn}_2(\text{BBOMB})_2]$  loops through which it passes for complexes **1** (left), **2** (middle) and **3** (right).

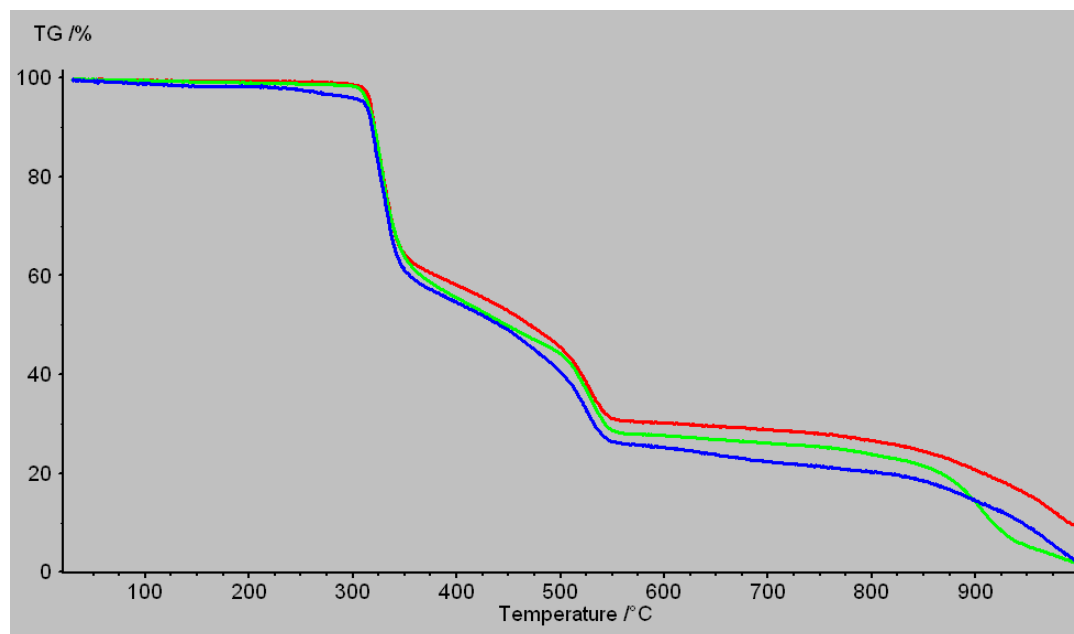

Figure S7 TGA curves for complexes **1** (red), **2** (blue) and **3** (green).
